# Supplementary material for: Validation of Urinary Charged Metabolite Profiles in Colorectal Cancer Using Capillary Electrophoresis-Mass Spectrometry
Source: MDPI journal article supplement (doi:10.3390/metabo12010059), 2022-01-10
Supplement: s1 [file s1]

Supplementary Material

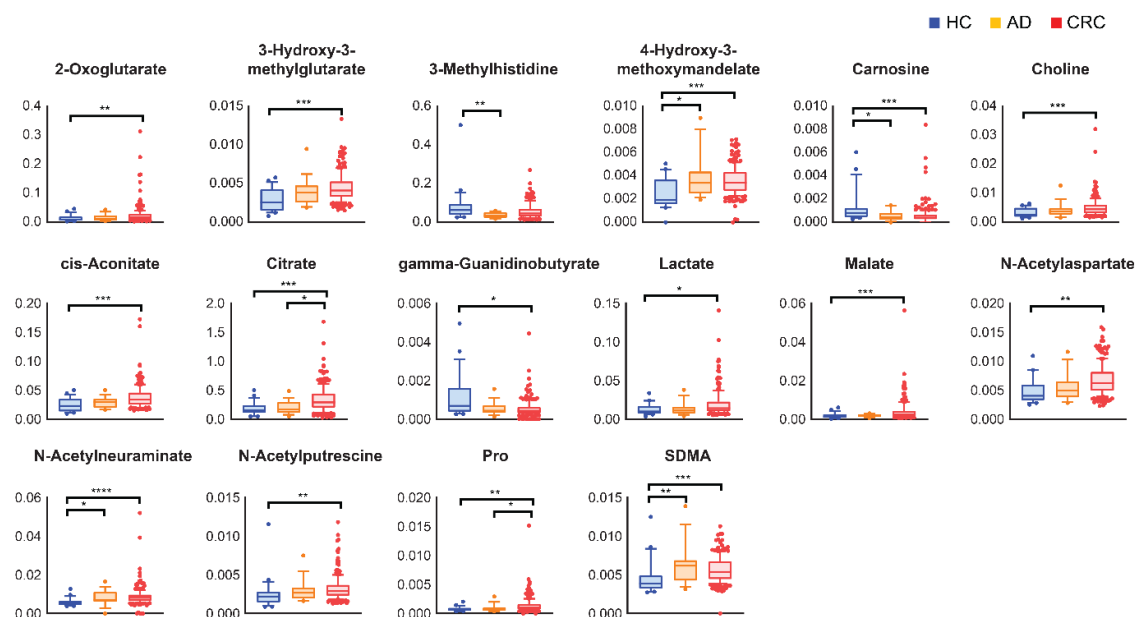

**Figure S1.** Metabolites showing consistent changes between data 1 and data 2. Box plots of data 1 of each metabolite. See the legend of Figure 2 for details.

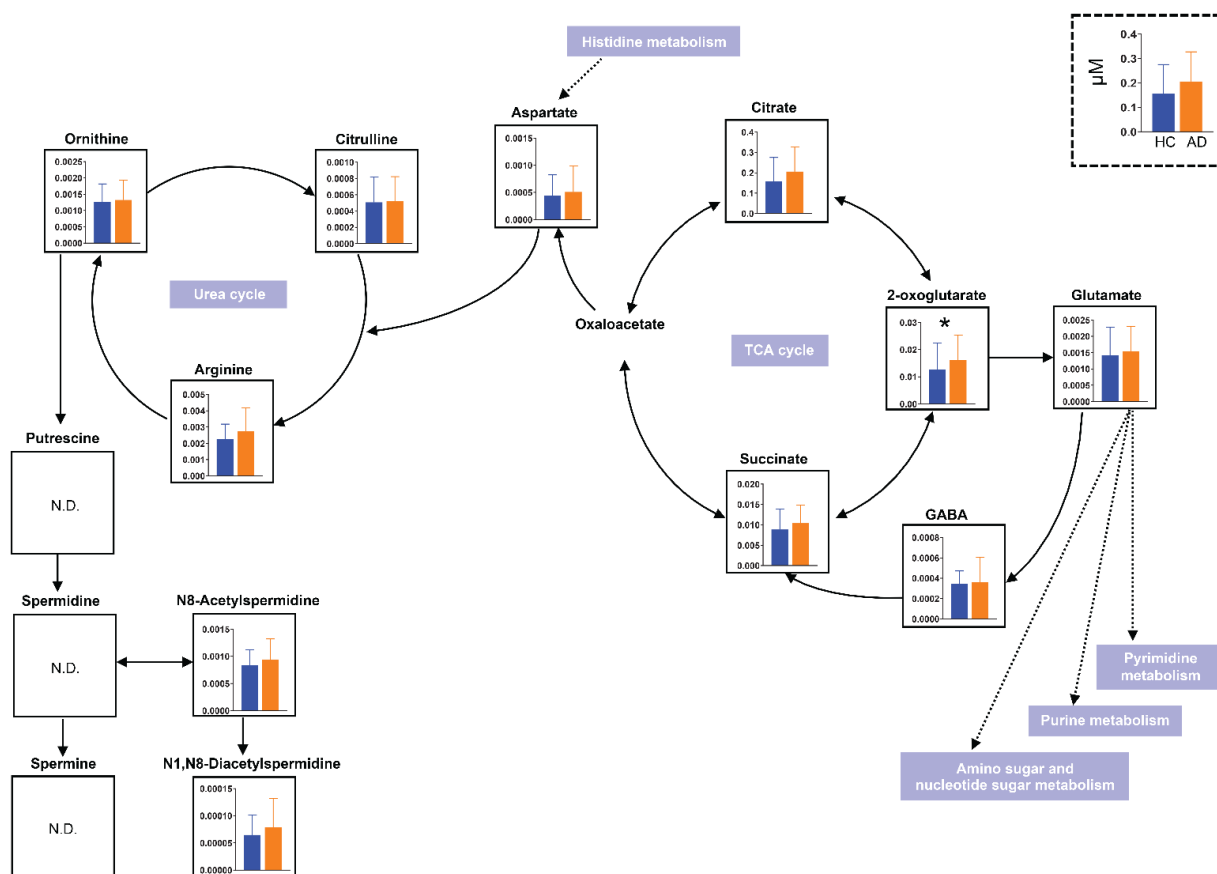

**Figure S2.** Comparison of metabolite concentrations between HC vs. AD. See the legend of Figure 6 for details.

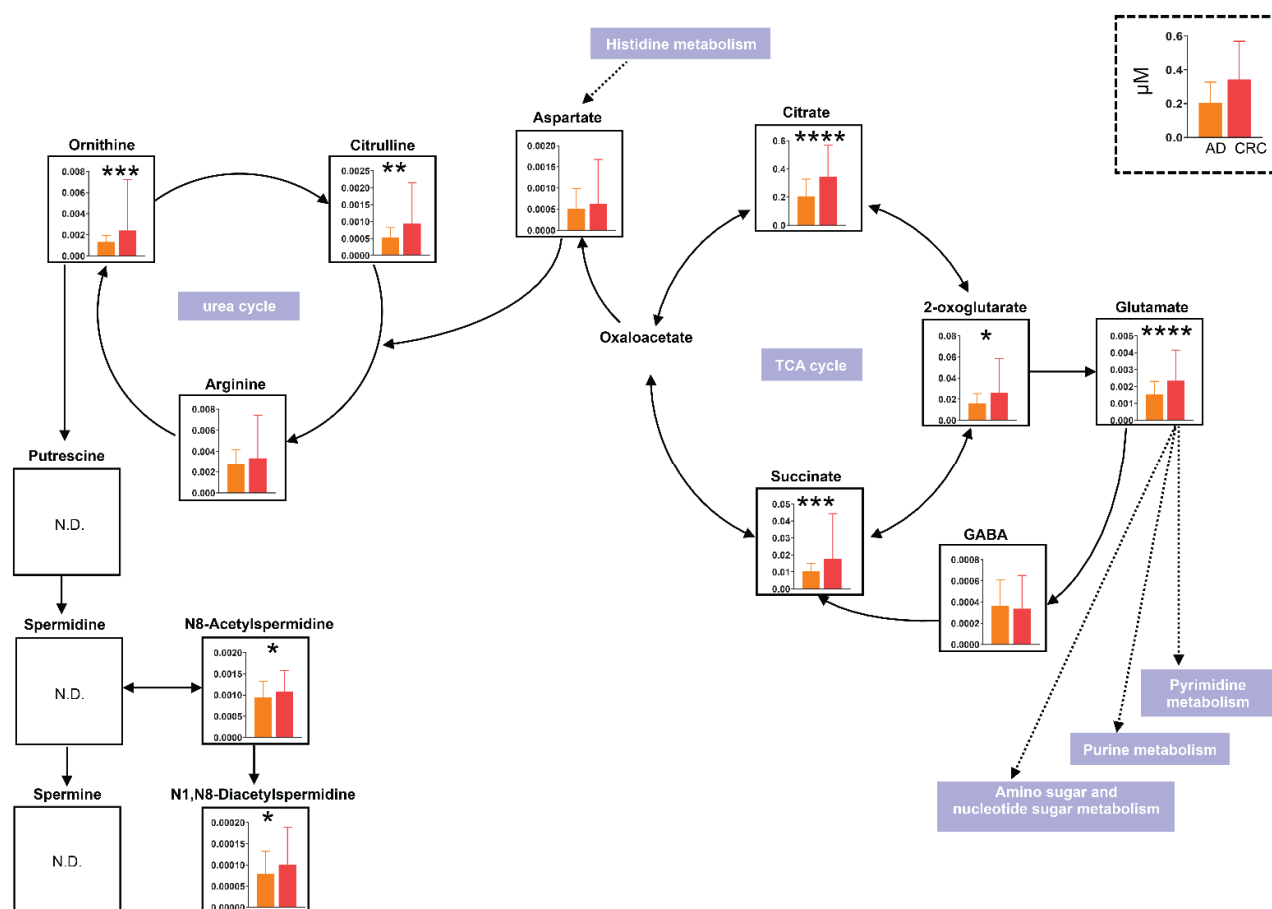

Figure S3. Comparison of metabolite concentrations between HC vs. AD + CRC. See the legend of Figure 6 for details.

Table S1. AUC value of  $N^8$ -acetylspermidine.

| $N^8$ -Acetylspermidine | AUC   | 95% CI |       | P    |
|-------------------------|-------|--------|-------|------|
| HC vs. AD               | 0.581 | 0.443  | 0.719 | 0.24 |
| AD vs. CRC              | 0.609 | 0.510  | 0.707 | 0.04 |
| HC vs. AD + CRC         | 0.682 | 0.600  | 0.763 | 0.00 |

AUC: area under the curve, CI: confidence interval, HC: healthy controls, AD: adenoma, CRC: colorectal cancer.

Table S2. AUC value of  $N^1,N^8$ -diacetylspermidine.

| $N^1,N^8$ -Diacetylspermidine | AUC   | 95% CI |       | P       |
|-------------------------------|-------|--------|-------|---------|
| HC vs. AD                     | 0.626 | 0.492  | 0.760 | 0.07    |
| AD vs. CRC                    | 0.623 | 0.532  | 0.715 | 0.02    |
| HC vs. AD + CRC               | 0.706 | 0.626  | 0.785 | <0.0001 |

AUC: area under the curve, CI: confidence interval, HC: healthy controls, AD: adenoma, CRC: colorectal cancer.

Table S3. AUC value of 2-oxoglutarate.

| 2-Oxoglutarate  | AUC   | 95% CI |       | P       |
|-----------------|-------|--------|-------|---------|
| HC vs. AD       | 0.666 | 0.536  | 0.796 | 0.66    |
| AD vs. CRC      | 0.631 | 0.534  | 0.729 | 0.84    |
| HC vs. AD + CRC | 0.748 | 0.600  | 0.763 | <0.0001 |

AUC: area under the curve, CI: confidence interval, HC: healthy controls, AD: adenoma, CRC: colorectal cancer.

**Table S4.** AUC value of citrate.

| Citrate         | AUC   | 95% CI |       | P       |
|-----------------|-------|--------|-------|---------|
| HC vs. AD       | 0.627 | 0.496  | 0.757 | 0.07    |
| AD vs. CRC      | 0.710 | 0.622  | 0.798 | <0.0001 |
| HC vs. AD + CRC | 0.771 | 0.692  | 0.850 | <0.0001 |

AUC: area under the curve, CI: confidence interval, HC: healthy controls, AD: adenoma, CRC: colorectal cancer.
